# Supplementary material
Source: PubMed Central journal article supplement (PMC2913291)
Supplement: NIHMS219108-supplement-1_si_001.pdf [file NIHMS219108-supplement-1_si_001.pdf]

# Discovery and Total Synthesis of a New Estrogen Receptor Heterodimerizing Actinopolymorphol A from *Actinopolymorpha rutilus*

Sheng-Xiong Huang,<sup>†</sup> Emily Powell,<sup>‡</sup> Scott R. Rajsiki,<sup>†</sup> Li-Xing Zhao,<sup>¥</sup> Cheng-Lin Jiang,<sup>¥</sup> Yanwen Duan,<sup>⊥</sup> Wei Xu,<sup>‡</sup> and Ben Shen<sup>\*,†,§,||</sup>

<sup>†</sup>*Division of Pharmaceutical Sciences, <sup>‡</sup>McArdle Laboratory for Cancer Research, <sup>§</sup>University of Wisconsin National Cooperative Drug Discovery Group, and <sup>||</sup>Department of Chemistry, University of Wisconsin-Madison, Madison, Wisconsin 53705, USA; <sup>¥</sup>Yunnan Institute of Microbiology, Yunnan University, Kunming, Yunnan 650091, China, and <sup>⊥</sup>Hunan Engineering Research Center of Combinatorial Biosynthesis and Natural Product Drug Discovery, Changsha, Hunan 410329, China*

\*To whom correspondence should be addressed. E-mail: [bshen@pharmacy.wisc.edu](mailto:bshen@pharmacy.wisc.edu)

## Supporting Information

### Table of Contents

|     |                                                                                                                                |       |
|-----|--------------------------------------------------------------------------------------------------------------------------------|-------|
| 1.  | General experimental procedures                                                                                                | S2    |
| 2.  | Fermentation and Isolation                                                                                                     | S2    |
| 3.  | Physico-chemical properties of <b>1</b> , <b>2</b> , and <b>3</b>                                                              | S2    |
| 4.  | Total synthesis of <b>1</b> from ( <i>S</i> )-2-hydroxy-3-(4-hydroxyphenyl)-propionic acid ( <b>4</b> )                        | S2-S4 |
| 5.  | <b>Table S1.</b> <sup>1</sup> H and <sup>13</sup> C NMR spectral data summary for compounds <b>1</b> , <b>2</b> , and <b>3</b> | S5    |
| 6.  | References                                                                                                                     | S5    |
| 7.  | <b>Figure S1.</b> HRESIMS of natural <b>1</b>                                                                                  | S6    |
| 8.  | <b>Figure S2.</b> <sup>1</sup> H-NMR spectrum of <b>1</b>                                                                      | S7    |
| 9.  | <b>Figure S3.</b> <sup>13</sup> C-NMR spectrum of <b>1</b>                                                                     | S8    |
| 10. | <b>Figure S4.</b> <sup>1</sup> H-NMR spectrum of <b>2</b>                                                                      | S9    |
| 11. | <b>Figure S5.</b> <sup>13</sup> C-NMR spectrum of <b>2</b>                                                                     | S10   |
| 12. | <b>Figure S6.</b> <sup>1</sup> H-NMR spectrum of <b>3</b>                                                                      | S11   |
| 13. | <b>Figure S7.</b> <sup>13</sup> C-NMR spectrum of <b>3</b>                                                                     | S12   |
| 14. | <b>Figure S8.</b> <sup>1</sup> H-NMR spectrum of <b>6</b>                                                                      | S13   |
| 15. | <b>Figure S9.</b> <sup>13</sup> C-NMR spectrum of <b>6</b>                                                                     | S14   |
| 16. | <b>Figure S10.</b> <sup>1</sup> H-NMR spectrum of <b>7</b>                                                                     | S15   |
| 17. | <b>Figure S11.</b> <sup>13</sup> C-NMR spectrum of <b>7</b>                                                                    | S16   |
| 18. | <b>Figure S12.</b> <sup>1</sup> H-NMR spectrum of <b>8</b>                                                                     | S17   |
| 19. | <b>Figure S13.</b> <sup>13</sup> C-NMR spectrum of <b>8</b>                                                                    | S18   |
| 20. | <b>Figure S14.</b> <sup>1</sup> H-NMR spectrum of <b>9</b>                                                                     | S19   |
| 21. | <b>Figure S15.</b> <sup>13</sup> C-NMR spectrum of <b>9</b>                                                                    | S20   |
| 22. | <b>Figure S16.</b> <sup>1</sup> H-NMR spectrum of <b>10</b>                                                                    | S21   |
| 23. | <b>Figure S17.</b> <sup>13</sup> C-NMR spectrum of <b>10</b>                                                                   | S22   |

**General experimental procedures.** Optical rotations were measured in CH<sub>3</sub>OH on a Perkin-Elmer 241 polarimeter at the sodium D line (589 nm). <sup>1</sup>H and <sup>13</sup>C NMR spectra were recorded at 25°C on a Varian Unity Inova 500 instrument operating at 500 MHz for <sup>1</sup>H and 125 MHz for <sup>13</sup>C nuclei. <sup>1</sup>H and <sup>13</sup>C NMR chemical shifts were referenced to residual solvent signals. <sup>1</sup>H-<sup>1</sup>H COSY, HMQC ( $J_{CH}=140$  Hz), and gHMBC ( $J_{XH}=8.0$  Hz) were performed using standard VARIAN pulse sequences. Electrospray ionization-mass (ESI-MS) spectra were acquired on an IonSpec HiResMALDI FT-Mass spectrometer with a 7 tesla superconducting magnet. Semipreparative HPLC was performed on a Varian liquid chromatograph system with an Atima-C18, 10 mm ×25 cm column. Silica gel chromatography applied to purification of specified synthetic compounds used 230-400 mesh size silica from Natland Int. Corp. Other chromatographic matrices included Lichroprep RP-18 gel (40–63 μm, Merck, Dramstadt, Germany) or Sephadex LH-20 (pharmacia) where indicated. Reactions were routinely run in flame-dried roundbottom flasks and under an atmosphere of Ar. All chemical reagents, unless otherwise noted, were obtained from Sigma-Aldrich and used as obtained directly from the manufacturer.

**Fermentation and isolation.** The strain *Actinopolymorpha rutilus* was obtained from Yunnan Institute of Microbiology, Yunnan University, Kunming, 650091, P. R. China. The inoculum was prepared by introducing the periphery of 10-day-old petri dish cultures of *A. rutilus* into 250 ml flasks containing 50 mL of the ISP2 broth, followed by shaking (250 rpm) continuously for 5 days at 28 ± 0.5°C. The follow-up fermentation was accomplished by adding the inoculum (50 mL) into 2-L flasks containing 500 mL of the culture broth [Sucrose (100 g), glucose (10.0 g), casamino acids (0.1 g), yeast extract (5.0 g), MOPS (21.0 g), trace elements (1 mL), K<sub>2</sub>SO<sub>4</sub> (0.25g), MgCl<sub>2</sub> ·6H<sub>2</sub>O (10.0 g), in a final volume of 1.0-L H<sub>2</sub>O, pH 7.0], and then shaking for 7 days in the same condition. Solid phase extraction of the broth using resin (HP-20), filtration through cheesecloth, and elution of the resin with acetone afforded, after solvent removal under vacuum, a gummy extract was obtained. The extract (8.5 g) was chromatographed on silica gel column using CHCl<sub>3</sub>-MeOH (100:0, 50:1, 20:1, 10:1, 5:1, 1:1 and 0:100, 1.50 L each) as the mobile phase to get seven fractions A-G. Fractions B and C (50:1 and 20:1, total 1.1g) were further chromatographed over RP-18 column eluted with a gradient (10% methanol, 30% methanol, 60% methanol, 90% methanol, 100% methanol) to yield five subfractions B1-B5. Subfractions B3 and B4 were combined and then subjected to Sephadex LH-20 column and eluted with methanol to yield three subfractions. These three subfractions were finally purified by semi-preparative HPLC to afford compounds **1** (1.5 mg), **2** (0.8 mg), and **3** (0.7 mg).

### Physico-chemical properties of **1**, **2**, and **3**

**Actinopolymorphol A (1):** Colorless oil;  $[\alpha]_D^{25} +20.9$  ( $c$  0.15, CH<sub>3</sub>OH) for natural product;  $[\alpha]_D^{25} +23.5$  ( $c$  0.28, CH<sub>3</sub>OH) for synthesized; HR-ESIMS (positive ion)  $m/z$  287.12567 (calcd for C<sub>15</sub>H<sub>20</sub>O<sub>4</sub>Na [M+Na]<sup>+</sup>, 287.12538); <sup>1</sup>H NMR and <sup>13</sup>C NMR, see Table S1.

**Actinopolymorphol B (2):** Colorless oil;  $[\alpha]_D^{25} +7.8$  ( $c$  0.10, CH<sub>3</sub>OH); HR-ESIMS (positive ion)  $m/z$  226.08290 (calcd for C<sub>12</sub>H<sub>13</sub>NO<sub>2</sub>Na [M+Na]<sup>+</sup>, 226.08380); <sup>1</sup>H NMR and <sup>13</sup>C NMR, see Table S1.

**Actinopolymorphol C (3):** Colorless oil; HR-ESIMS (positive ion)  $m/z$  315.11250 (calcd for C<sub>18</sub>H<sub>16</sub> N<sub>2</sub>O<sub>2</sub>Na [M+Na]<sup>+</sup>, 315.11039); <sup>1</sup>H NMR and <sup>13</sup>C NMR, see Table S1.

### Synthesis of **1** (*S*)-2-hydroxy-3-(4-hydroxyphenyl)-propionic acid (**4**)

**(*S*)-3-(4-Hydroxyphenyl)-2-hydroxypropionyl methyl ester (5).** (*S*)-3-(4-Hydroxyphenyl)-2-hydroxypropionic acid (1 g, 5.5 mmol) from Astatech, Inc. (Bristol, PA) was dissolved in 120 mL ACS grade MeOH at rt. The methanolic solution was then subjected to a constant stream of HCl gas (generated via dropwise addition of H<sub>2</sub>SO<sub>4</sub> to solid NaCl) for a period of 2 h at rt followed by solvent removal *in vacuo* at 50°C. The resulting faint yellowish gum was then subjected to column chromatography over silica (2:1:0.4 Hex:EtOAc:MeOH) affording 1.08 g of methyl ester **5** as a thick transparent oil. All spectral data matched those previously reported.<sup>1</sup>

**(S)-3-(4-*O*-tert-butyldimethylsiloxyphenyl)-2-tert-butyldimethylsiloxy propionyl methyl ester (6).** (S)-3-(4-Hydroxyphenyl)-2-hydroxypropionyl methyl ester (**5**) (4 g, 20.4 mmol) was dissolved in 50 mL anhydrous DMF and the solution chilled for 10 min to 0°C followed by addition of imidazole (4.16 g, 61.2 mmol). The solution was stirred at 0°C for 10 min and then TBSCl (9.22 g, 61.2 mmol) was added and the resulting mixture stirred at 0°C for 15 min. The reaction was then allowed to warm from 0°C to rt over the course of 4 h, and TLC (2:1:0.4 Hex:EtOAc:MeOH) revealed complete loss of starting material and generation of one UV active fast mobility spot. The reaction was then chilled back to 0°C and quenched by addition of cold dilute NH<sub>4</sub>Cl (100 mL) and ~20 g NaCl. After 5 min the reaction was partitioned into an equal volume of EtOAc. Organic layer was separated and remaining aqueous phase extracted with EtOAc (3 x 50 mL). Organic layers were combined and washed with satd NH<sub>4</sub>Cl (3 x 50) followed by washing with brine (2 x 100 mL). Organic layer was then dried over anhydrous Na<sub>2</sub>SO<sub>4</sub> for 10 min. Solids were filtered off and solvent removed *in vacuo* to render 9.17 g crude **6**. Column chromatography over silica (2:1:0.4 Hex:EtOAc:MeOH) afforded 7.8 g pure **6** (90% yield). Colorless oil; HR-ESIMS (positive ion) *m/z* 447.23734 (calcd for C<sub>22</sub>H<sub>40</sub> O<sub>4</sub>Si<sub>2</sub>Na [M+Na]<sup>+</sup>, 447.23573); <sup>1</sup>H NMR in CDCl<sub>3</sub>: δ 6.75 (d, *J* = 8.4 Hz), 7.07 (d, *J* = 8.4 Hz), 3.01 (dd, *J* = 3.6, 12.6 Hz), 2.80 (dd, *J* = 9.2, 12.6 Hz), 4.28 (dd, *J* = 3.6, 9.2 Hz), 3.72 (OMe, s), -0.20 (s), -0.13 (s), 0.17 (s), 0.80 (s), and 0.97 (s); <sup>13</sup>C NMR: δ<sub>c</sub> 130.8 (s, C-1), 131.2 (d, C-2, 6), 120.5 (d, C-3, 5), 154.9 (s, C-4), 41.4 (t, C-7), 74.6 (d, C-8), 174.3 (s, C-9), 52.3 (q, OMe), 26.2, 26.1, 18.8, -3.9, -5.1.

**(S)-3-(4-*O*-tert-butyldimethylsiloxyphenyl)-2-tert-butyldimethylsiloxy N-methoxy, N-methyl propionamide (7).** To methyl ester **6** (390 mg, 0.92 mmol) was added 3 mL anhydrous THF in a flame dried roundbottom flask under Ar atmosphere. The solution was chilled to 0°C for 10 min followed by the addition of *N,O*-dimethylhydroxylamine hydrochloride (140 mg, 1.44 mmol). The slurry was then chilled to -20°C and 1.38 mL (2.8 mmol) of (CH<sub>3</sub>)<sub>2</sub>CHMgCl (2M in THF) added dropwise. The mixture was stirred at -20°C for 1 h followed by quenching via addition of satd NH<sub>4</sub>Cl (10 mL) and partitioning into an equal volume of EtOAc. Aqueous layer was extracted with EtOAc (3 x 50 mL) and then organic fractions pooled and washed with saturated NH<sub>4</sub>Cl (3 x 50 mL) and then brine (2 x 50 mL). Organic layer was dried by addition of anhydrous Na<sub>2</sub>SO<sub>4</sub> for 10 min. Solids were then filtered off and solvent removed *in vacuo*. The resulting gum was subjected to column chromatography (10:1:1 Hex:EtOAc:MeOH) to afford 340 mg of **7** (81% yield). Colorless oil; HR-ESIMS (positive ion) *m/z* 476.26342 (calcd for C<sub>23</sub>H<sub>43</sub> NO<sub>4</sub>Si<sub>2</sub>Na [M+Na]<sup>+</sup>, 476.26228); <sup>1</sup>H NMR in CDCl<sub>3</sub>: δ<sub>H</sub> 6.74 (d, *J* = 8.4 Hz), 7.07 (d, *J* = 8.4 Hz), 2.95 (dd, *J* = 4.4, 13.2 Hz), 2.74 (dd, *J* = 8.8, 13.2 Hz), 4.61 (dd, *J* = 4.4, 8.8 Hz), 3.61 (OMe, s), 3.29 (NMe), -0.16 (s), -0.13 (s), 0.15 (s), 0.78 (s), and 0.97 (s); <sup>13</sup>C NMR: δ<sub>c</sub> 131.2 (s, C-1), 131.0 (d, C-2, 6), 120.2 (d, C-3, 5), 154.6 (s, C-4), 32.8 (t, C-7), 72.1 (d, C-8), 174.3 (s, C-9), 61.4 (q, OMe), 40.7 (q, NMe), 26.0, 26.1, 18.6, -4.8.

**(S)-8-(*O*-tert-butyldimethylsiloxy)-4-*O*-tert-butyldimethylsiloxy satabacin (8).** To Weinreb amide **7** (270 mg, 0.6 mmol) was added 4 mL anhydrous THF in a flame dried roundbottom flask under Ar atmosphere. The solution was chilled to 0°C for 10 min followed by the addition of 0.7 mL 2M (CH<sub>3</sub>)<sub>2</sub>CHCH<sub>2</sub>MgCl in THF (1.4 mmol) at 0°C. Reaction was stirred at 0°C for 2 h and then allowed to warm to rt; reaction was stirred at rt for 24h. Following incubation at rt, the reaction was chilled back to 0°C and then quenched via addition of cold 2N HCl (pH ~ 3) (15 mL) and partitioned into an equal volume of EtOAc. Aqueous layer was extracted with EtOAc (3 x 25 mL) and then organic fractions pooled and washed with saturated NH<sub>4</sub>Cl (3 x 50 mL) and then brine (2 x 50 mL). Organic layer was dried by addition of anhydrous Na<sub>2</sub>SO<sub>4</sub> for 10 min. Solids were then filtered off and solvent removed *in vacuo*. The resulting gum (310 mg crude) was subjected to column chromatography (15:1 Hex:EtOAc) to afford 180 mg of **8** (67% yield). Colorless oil; HR-ESIMS (positive ion) *m/z* 473.28975 (calcd for C<sub>25</sub>H<sub>46</sub> O<sub>3</sub>Si<sub>2</sub>Na [M+Na]<sup>+</sup>, 473.28777); <sup>1</sup>H NMR in CDCl<sub>3</sub>: δ<sub>H</sub> 6.76 (d, *J* = 8.4 Hz), 7.05 (d, *J* = 8.4 Hz), 2.84 (dd, *J* = 4.4, 13.6 Hz), 2.69 (dd, *J* = 8.8, 13.6 Hz), 4.10 (dd, *J* = 4.4, 8.8 Hz), 2.31-2.45 (m), 2.14 (m), 0.90 (d, *J* = 6.8 Hz), 0.88 (d, *J* = 6.8 Hz), -0.30 (s), -0.11 (s), 0.17 (s), 0.85 (s), 0.89 (s); <sup>13</sup>C NMR: δ<sub>c</sub> 130.4 (s, C-1), 131.3 (d, C-2, 6), 120.3 (d, C-3, 5), 154.8 (s, C-4), 40.9 (t, C-7), 80.8 (d, C-8), 213.1 (s, C-9), 47.0 (t, C-10), 23.7 (d, C-11), 23.1 (q, C-12), 23.1 (q, C-13), 26.2, 26.1, 18.6, -5.1.

**(S)-4-hydroxysattabacin (9).** Diprotected ketone **8** (350 mg, 0.78 mmol) was dissolved in 8.5 mL anhydrous THF at 0°C. After 10 min 2.3 mL of tetrabutylammonium fluoride (TBAF) (1M in THF) (2.33 mmol) was added dropwise at 0°C. Reaction was stirred at 0°C for 45 min at which time TLC analysis (15:1 Hex:EtOAc) revealed surprisingly little change to starting material. The reaction was then allowed to warm to rt over the course of 1.5 h after which time it was apparent by TLC that starting material was consumed. The reaction was chilled back to 0°C and quenched via addition of cold 2N HCl (pH ~3) (15 mL) and partitioned into an equal volume of EtOAc. Aqueous layer was extracted with EtOAc (3 x 25 mL) and then organic fractions pooled and washed with satd NH<sub>4</sub>Cl (3 x 50 mL) and then brine (2 x 50 mL). Organic layer was dried by addition of anhydrous Na<sub>2</sub>SO<sub>4</sub> for 10 min. Solids were then filtered off and solvent removed *in vacuo*. The resulting 150 mg of crude diol was subjected to column chromatography (3:1 Hex:EtOAc) to afford 140 mg of **9** (81% yield). Colorless oil; <sup>1</sup>H NMR in CDCl<sub>3</sub>: δ<sub>H</sub> 6.66 (d, *J* = 8.4 Hz), 7.03 (d, *J* = 8.4 Hz), 3.06 (dd, *J* = 4.4, 14.4 Hz), 2.74 (dd, *J* = 7.6, 14.4 Hz), 4.36 (m), 2.39 (2H, d, *J* = 7.2 Hz), 2.18 (m), 0.92 (d, *J* = 6.8 Hz), 0.92 (d, *J* = 6.8 Hz), 6.18 (OH), 3.67 (OH); <sup>13</sup>C NMR: δ<sub>C</sub> 128.2 (s, C-1), 130.6 (d, C-2, 6), 115.7 (d, C-3, 5), 155.0 (s, C-4), 39.3 (t, C-7), 77.9 (d, C-8), 211.9 (s, C-9), 47.7 (t, C-10), 24.9 (d, C-11), 22.9 (q, C-12), 22.8 (q, C-13).

**(S)-4-acetoxy-8-acetylsattabacin (10).** Diol **9** (110 mg, 0.5 mmol) was dissolved in 2 mL anhydrous CH<sub>2</sub>Cl<sub>2</sub> and chilled to 0°C for 10 min. To the chilled solution of **9** was added 500 mL of a premixed 1:1 combination of acetic anhydride and pyridine dropwise over a 5 min duration. The reaction was then allowed to warm to rt and to stir overnight. The reaction was quenched via addition of 3 mL MeOH and 3 mL EtOAc at 0°C. The solvents were removed *in vacuo* with gentle heating (~45°C) and the crude syrup subjected to immediate column chromatography (3:1 Hex:EtOAc) to afford 110 mg of diacetate **10** (72% yield). Colorless oil; [α]<sub>D</sub><sup>23</sup> +25.1 (*c* 0.18, CH<sub>3</sub>OH); HR-ESIMS (positive ion) *m/z* 329.13618 (calcd for C<sub>17</sub>H<sub>22</sub> O<sub>5</sub>Na [M+Na]<sup>+</sup>, 329.13595); <sup>1</sup>H NMR in CDCl<sub>3</sub>: δ<sub>H</sub> 7.00 (d, *J* = 8.4 Hz), 7.19 (d, *J* = 8.4 Hz), 3.05 (dd, *J* = 4.4, 14.0 Hz), 2.93 (dd, *J* = 8.8, 14.0 Hz), 5.13 (dd, *J* = 4.4, 8.8), 2.32 (dd, *J* = 6.4, 17.2 Hz), 2.17 (dd, *J* = 6.8, 17.2 Hz), 2.11 (m), 0.85 (d, *J* = 6.5 Hz), 0.86 (d, *J* = 6.5 Hz), 2.25 (OAc), 2.05 (OAc); <sup>13</sup>C NMR: δ<sub>C</sub> 133.9 (s, C-1), 130.6 (d, C-2, 6), 121.9 (d, C-3, 5), 149.5 (s, C-4), 36.2 (t, C-7), 79.1 (d, C-8), 206.8 (s, C-9), 48.4 (t, C-10), 24.0 (d, C-11), 22.8 (q, C-12), 22.8 (q, C-13), 170.6 (OAc), 169.7 (OAc), 21.4 (OAc), 20.9 (OAc).

**Actinopolymorphol A (1).** Diacetate **10** (70 mg, 0.23 mmol) was dissolved in 1 mL pyrrolidine at rt and stirred for 1 min. The reaction was then diluted with 2 mL cold EtOAc and transferred immediately to a rapidly stirring solution of 10 mL 1:1 2N HCl:satd NH<sub>4</sub>Cl at 0°C. The mixture was then partitioned into 25 mL EtOAc. The layers were separated and remaining aqueous layer was extracted with EtOAc (3 x 25 mL) and then organic fractions pooled and washed with satd NH<sub>4</sub>Cl (3 x 50 mL) and then brine (2 x 50 mL). Organic layer was dried by addition of anhydrous Na<sub>2</sub>SO<sub>4</sub> for 10 min. Solids were then filtered off and solvent removed *in vacuo* to afford 40 mg of monoacetate **1** in > 95 % purity based on <sup>1</sup>H-NMR (66% yield). Colorless oil; [α]<sub>D</sub><sup>23</sup> +20.9 (*c* 0.15, CH<sub>3</sub>OH); HR-ESIMS (positive ion) *m/z* 287.12567 (calcd for C<sub>15</sub>H<sub>20</sub>O<sub>4</sub>Na [M+Na]<sup>+</sup>, 287.12538); <sup>1</sup>H NMR and <sup>13</sup>C NMR data see Table S1. See Figure 1B in manuscript for key HMBC and COSY correlations.

**Table S1.** Summary of NMR data for compounds **1**, **2**, and **3** in methanol-*d*<sub>4</sub>.

| No. | <b>1</b>        |                                              | <b>2</b>        |                                              | <b>3</b>        |                                  |
|-----|-----------------|----------------------------------------------|-----------------|----------------------------------------------|-----------------|----------------------------------|
|     | <sup>13</sup> C | <sup>1</sup> H ( <i>J</i> in Hz)             | <sup>13</sup> C | <sup>1</sup> H ( <i>J</i> in Hz)             | <sup>13</sup> C | <sup>1</sup> H ( <i>J</i> in Hz) |
| 1   | 126.9           |                                              |                 |                                              | 129.8           |                                  |
| 1a  |                 |                                              | 137.2           |                                              |                 |                                  |
| 2   | 130.3           | 7.02 (d, 8.4)                                | 123.8           | 7.14 (s)                                     | 130.5           | 7.06 (d, 9.0)                    |
| 3   | 115.1           | 6.68 (d, 8.4)                                | 117.4           |                                              | 116.0           | 6.67 (d, 9.0)                    |
| 4   | 156.4           |                                              | 118.6           | 7.60 (d, 9.0)                                | 156.5           |                                  |
| 4a  |                 |                                              | 128.1           |                                              |                 |                                  |
| 5   | 115.1           | 6.68 (d, 8.4)                                | 118.9           | 7.03 (dt, 0.8, 9.0)                          | 116.0           | 6.67 (d, 9.0)                    |
| 6   | 130.3           | 7.02 (d, 8.4)                                | 121.5           | 7.11 (dt, 0.8, 9.0)                          | 130.5           | 7.06 (d, 9.0)                    |
| 7   | 35.7            | 2.98 (dd, 5.0, 14.4)                         | 111.4           | 7.35 (d, 9.0)                                | 40.2            | 3.96 (s)                         |
| 8   | 79.6            | 5.08 (dd, 5.0, 8.2)                          | 30.0            | 3.21 (dd, 5.5, 15.0)<br>3.09 (dd, 7.0, 15.0) | 154.7           |                                  |
| 9   | 207.8           |                                              | 77.9            | 4.39 (dd, 5.5, 7.0)                          | 143.9           | 8.44 (s)                         |
| 10  | 47.8            | 2.35 (dd, 6.6, 17.4)<br>2.16 (dd, 6.6, 17.4) | 212.7           |                                              |                 |                                  |
| 11  | 43.7            | 2.03 (m)                                     | 25.5            | 2.14 (s)                                     |                 |                                  |
| 12  | 21.7            | 0.82 (d, 6.8)                                |                 |                                              |                 |                                  |
| 13  | 21.7            | 0.84 (d, 6.8)                                |                 |                                              |                 |                                  |
| OAc | 170.9           |                                              |                 |                                              |                 |                                  |
| OAc | 19.3            | 2.04 (s)                                     |                 |                                              |                 |                                  |

**References:**

Andrus, M. B.; Hicken, E. J.; Stephens, J.C.; Bedke, D. K. *J. Org. Chem.* **2006**, *71*, 8651-8654.

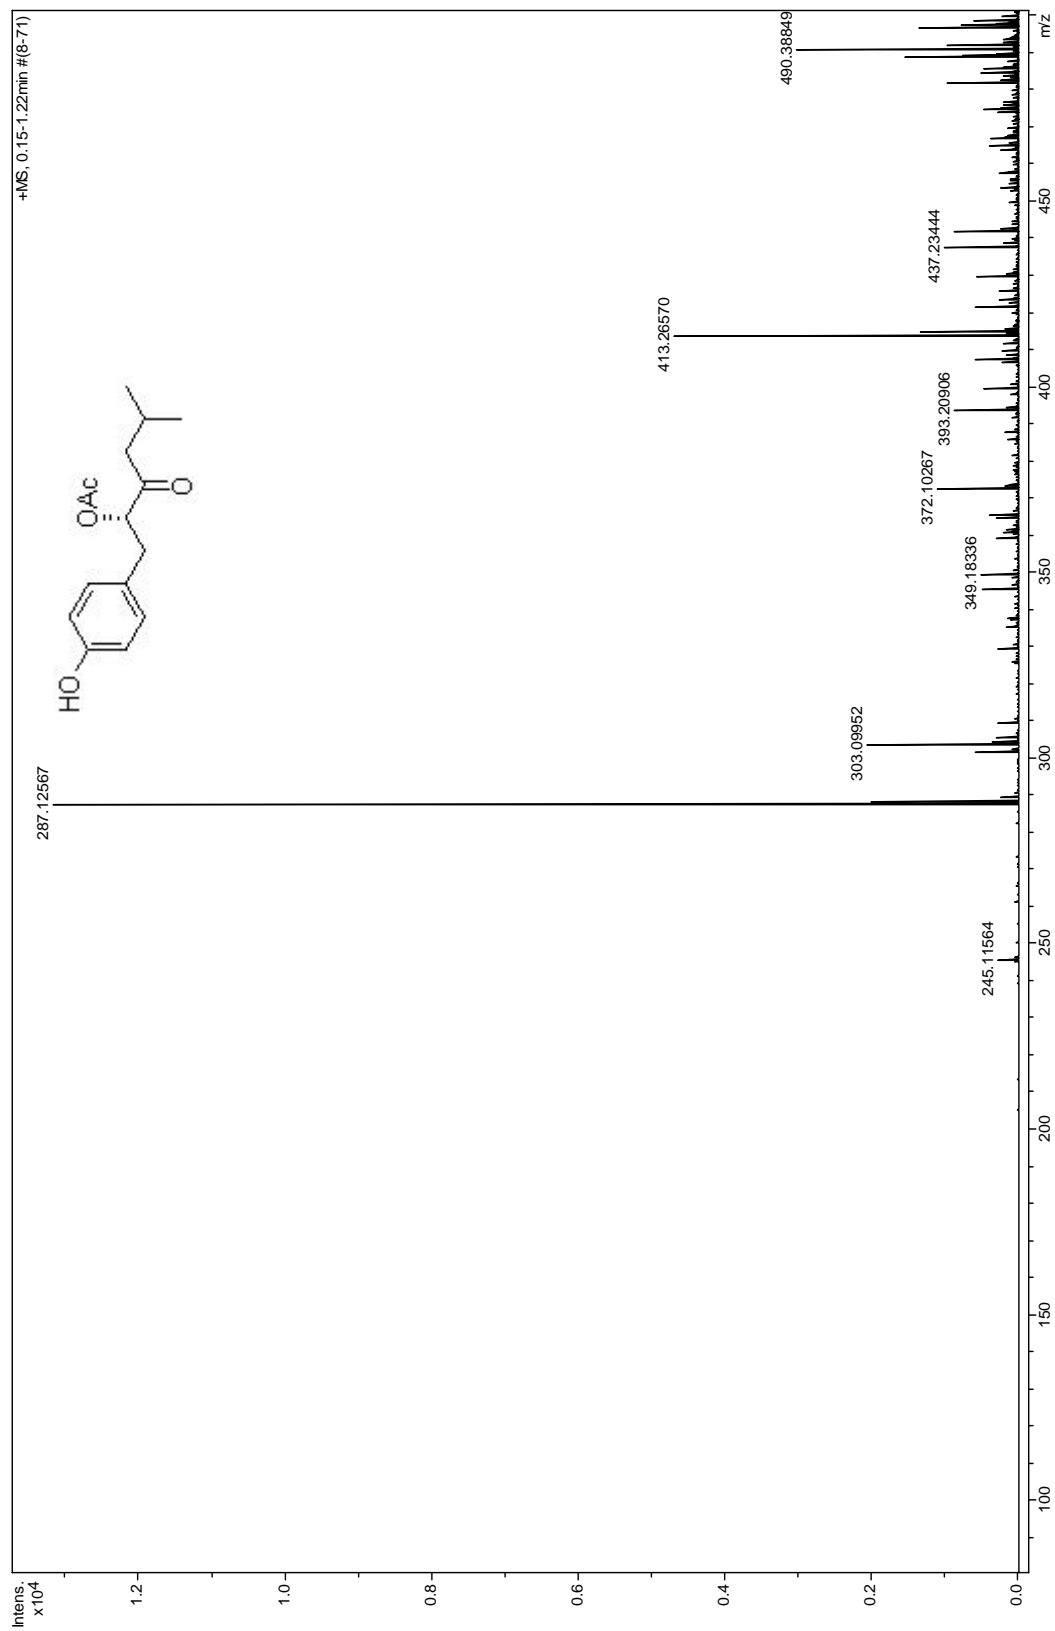

**Figure S1.** HRESIMS of **1**

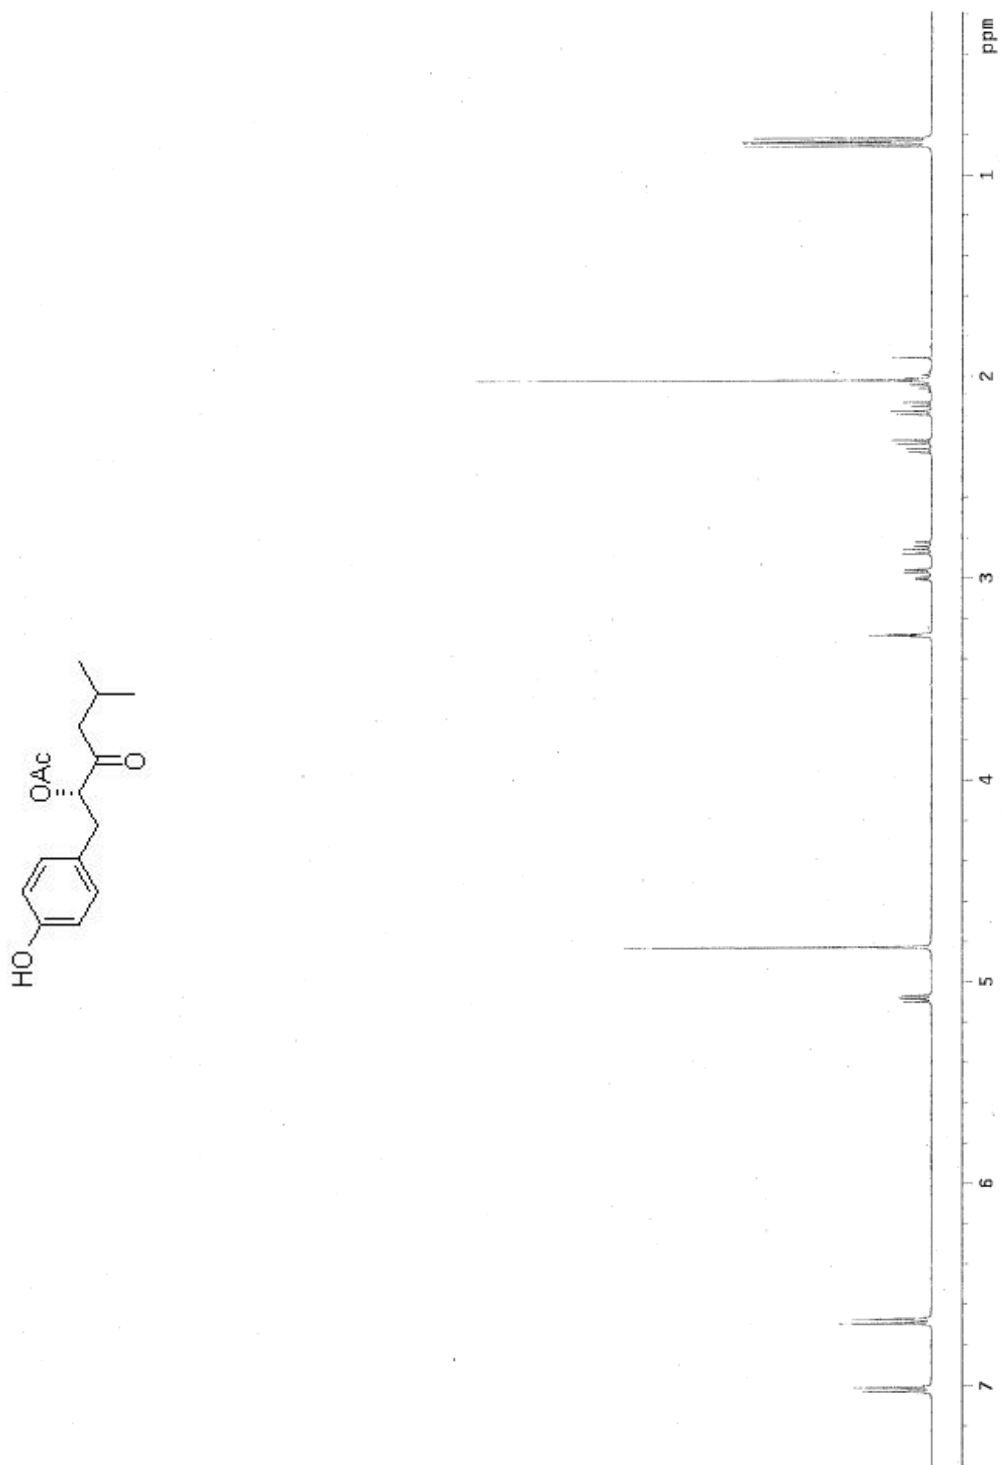

**Figure S2.** <sup>1</sup>H NMR spectrum of **1**

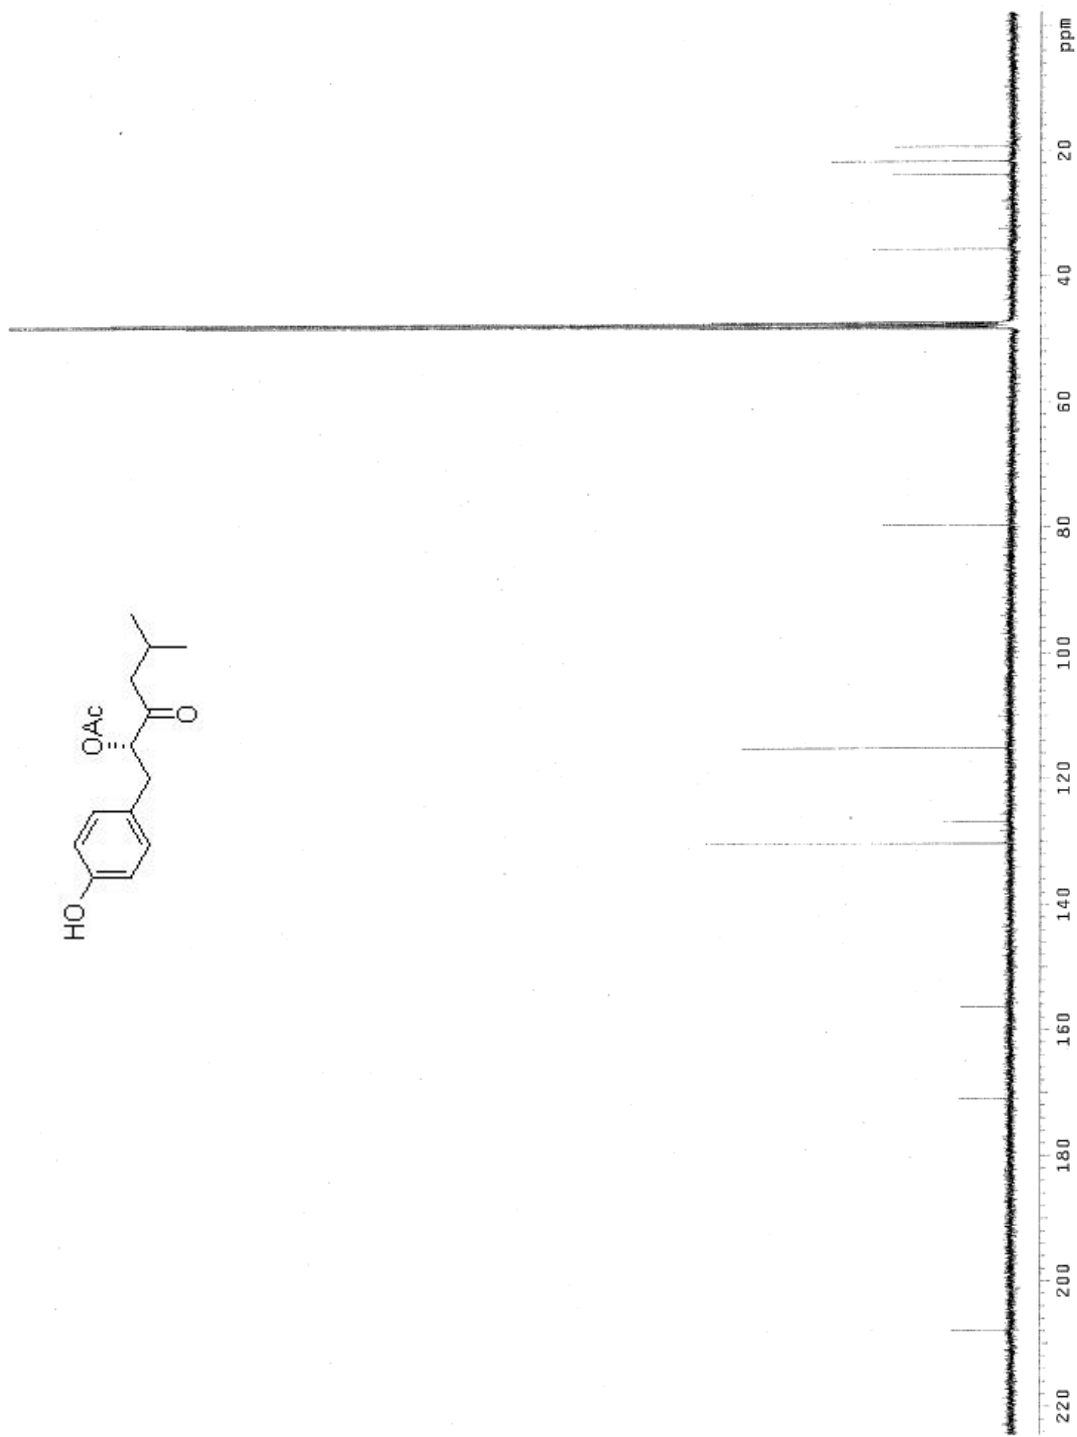

**Figure S3.**  $^{13}\text{C}$  NMR spectrum of **1**



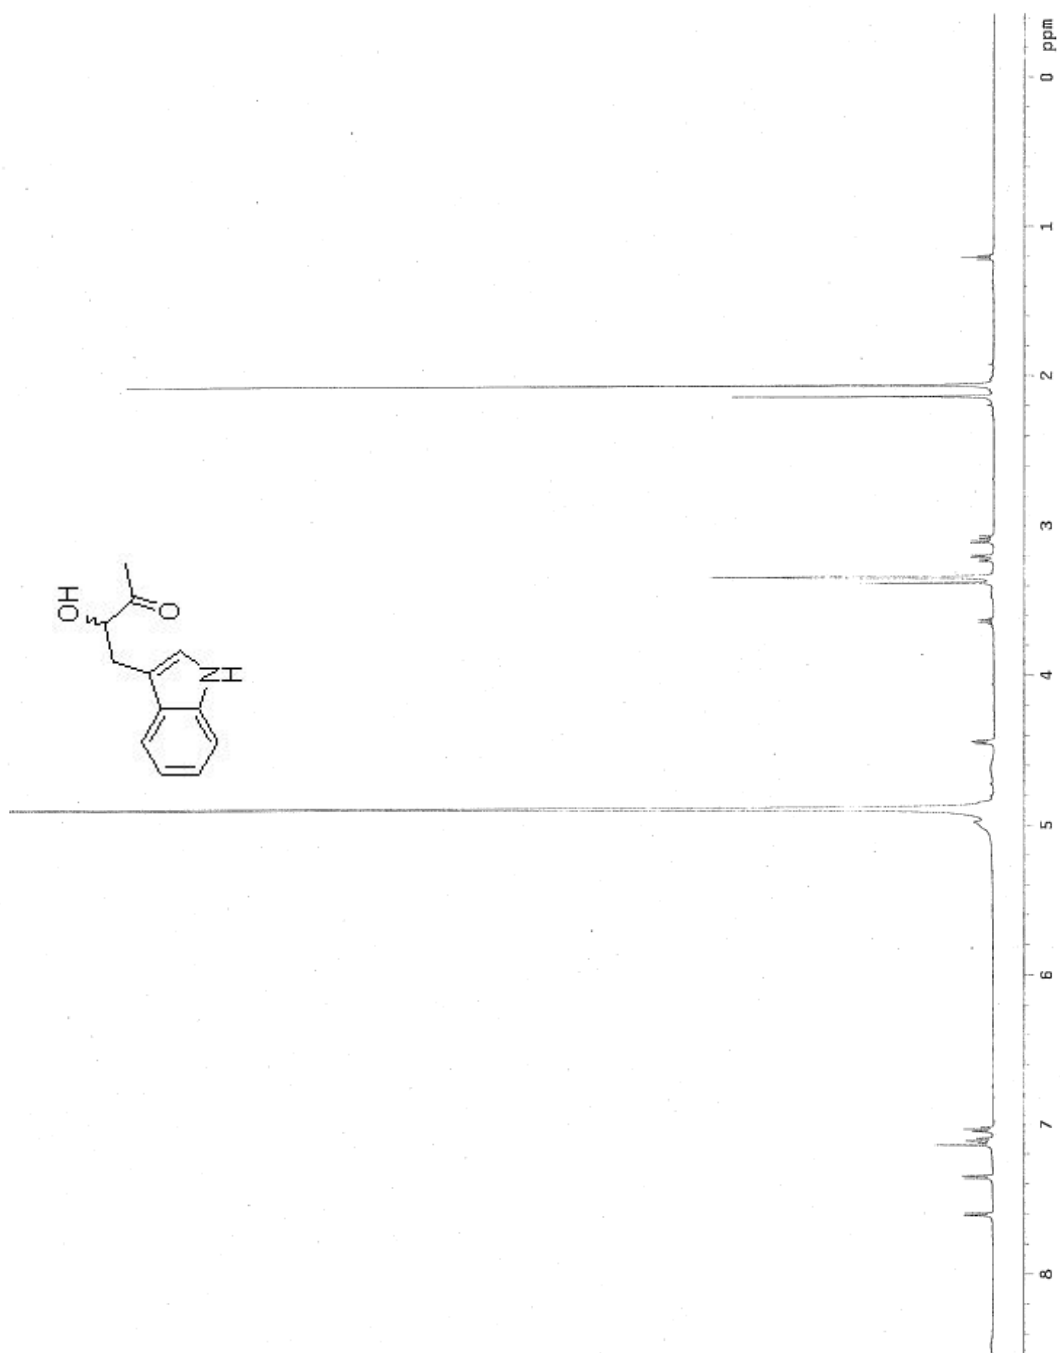

**Figure S4.** <sup>1</sup>H NMR spectrum of **2**

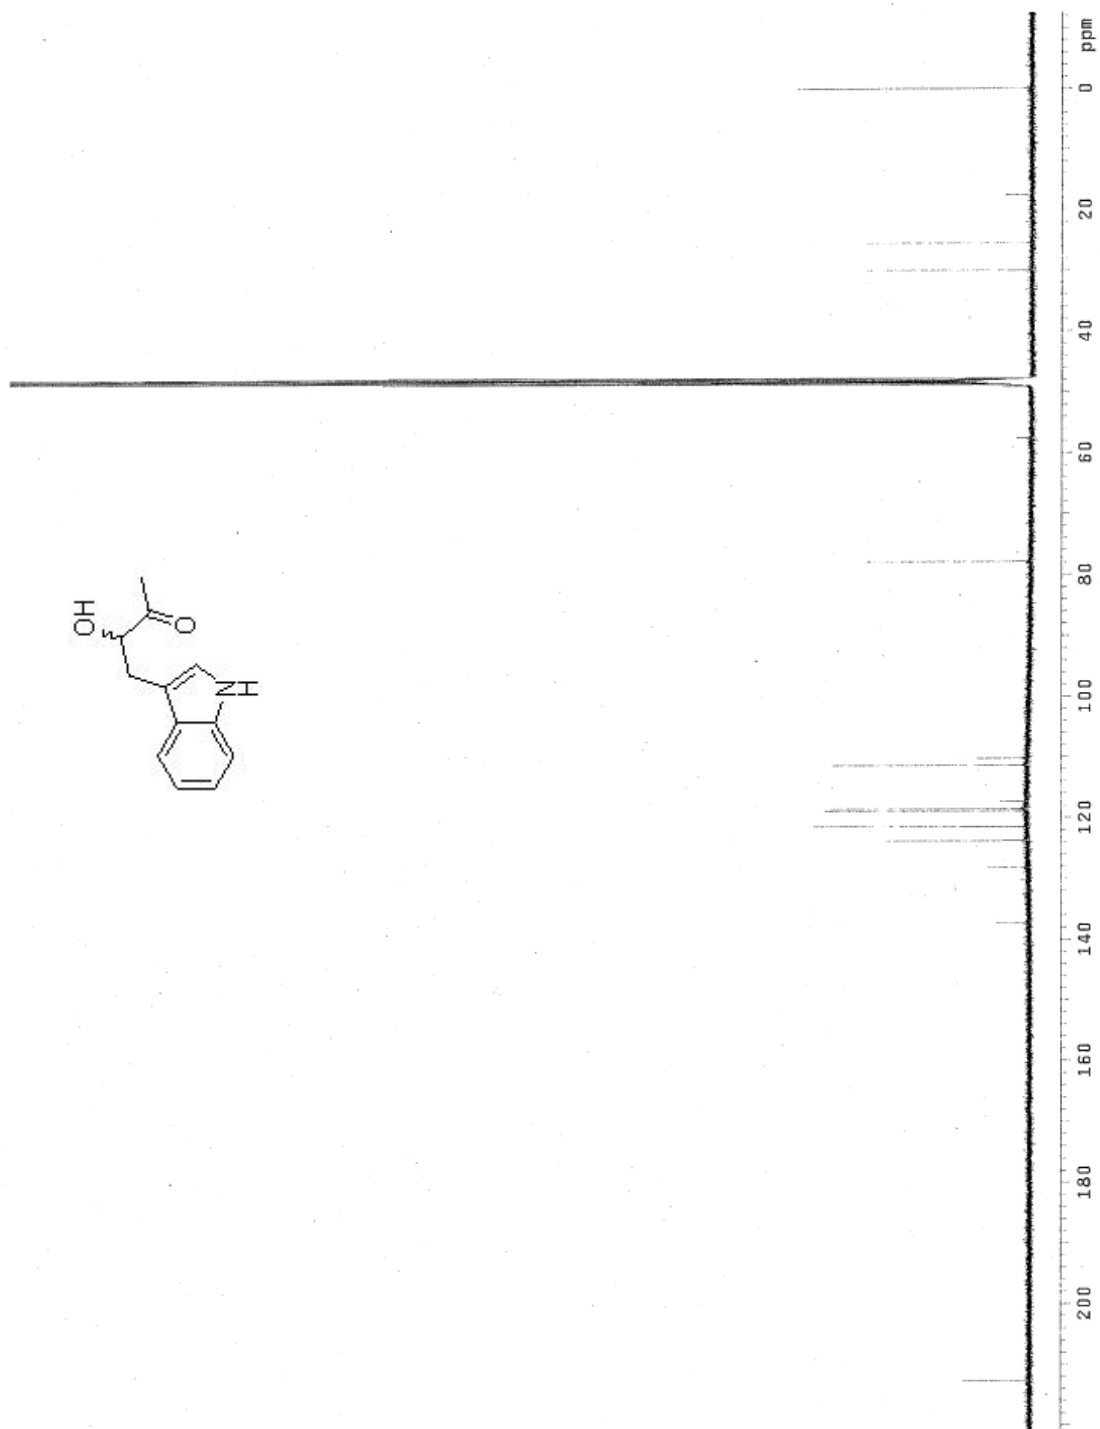

**Figure S5.**  $^{13}\text{C}$  NMR spectrum of **2**

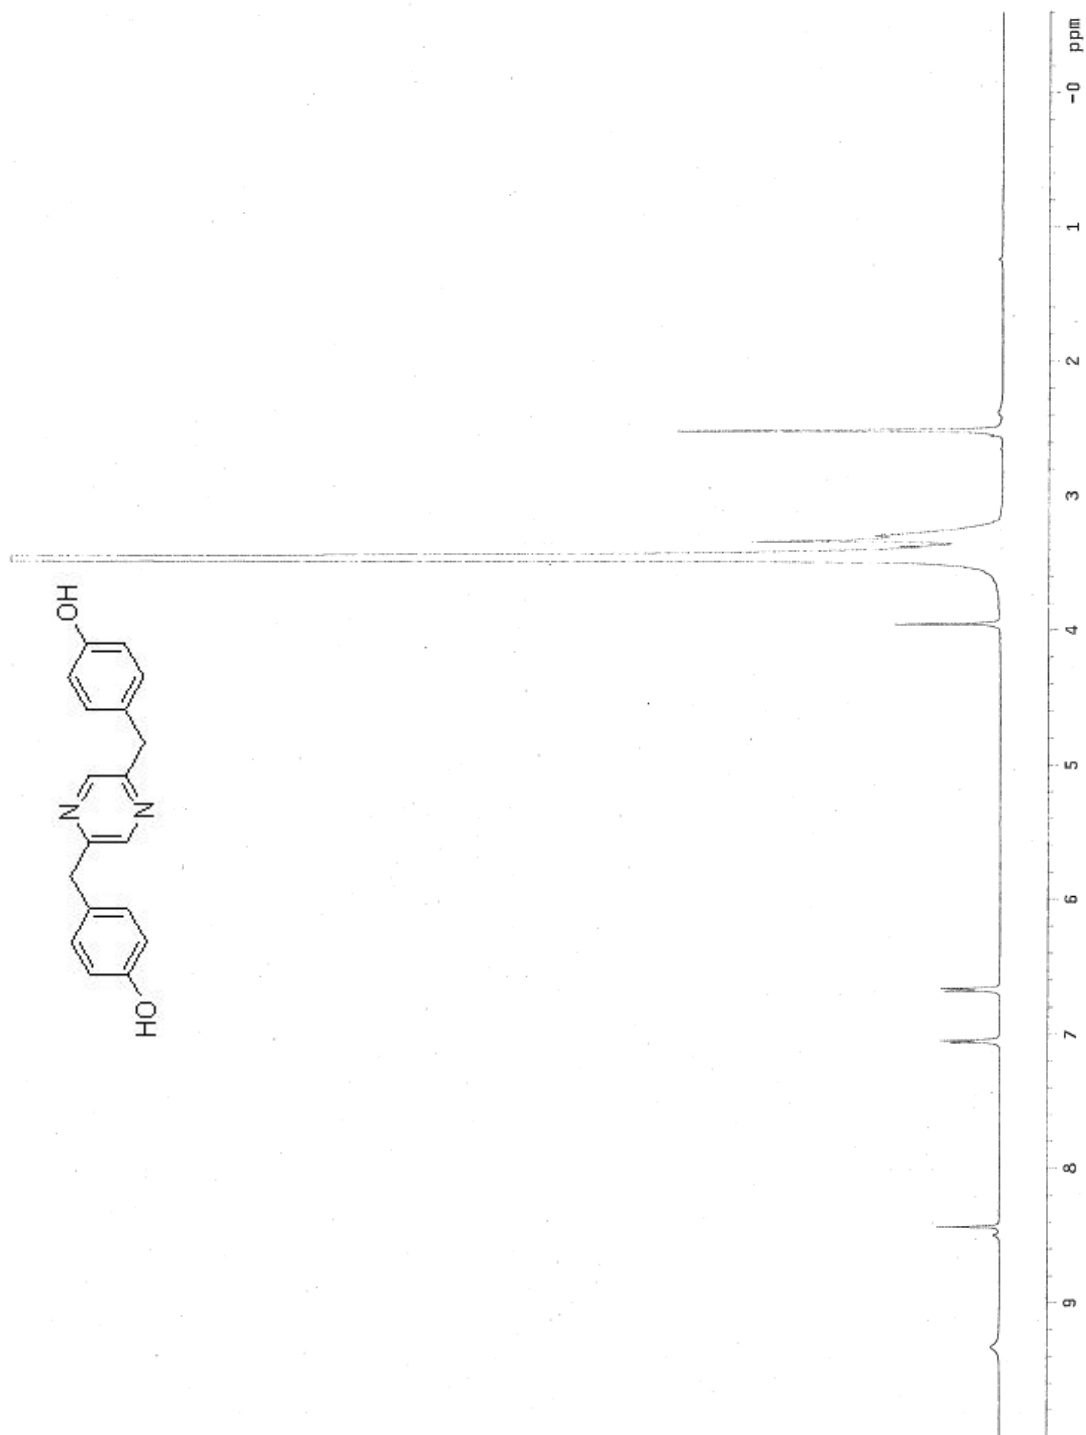

**Figure S6.**  $^1\text{H}$  NMR spectrum of **3**

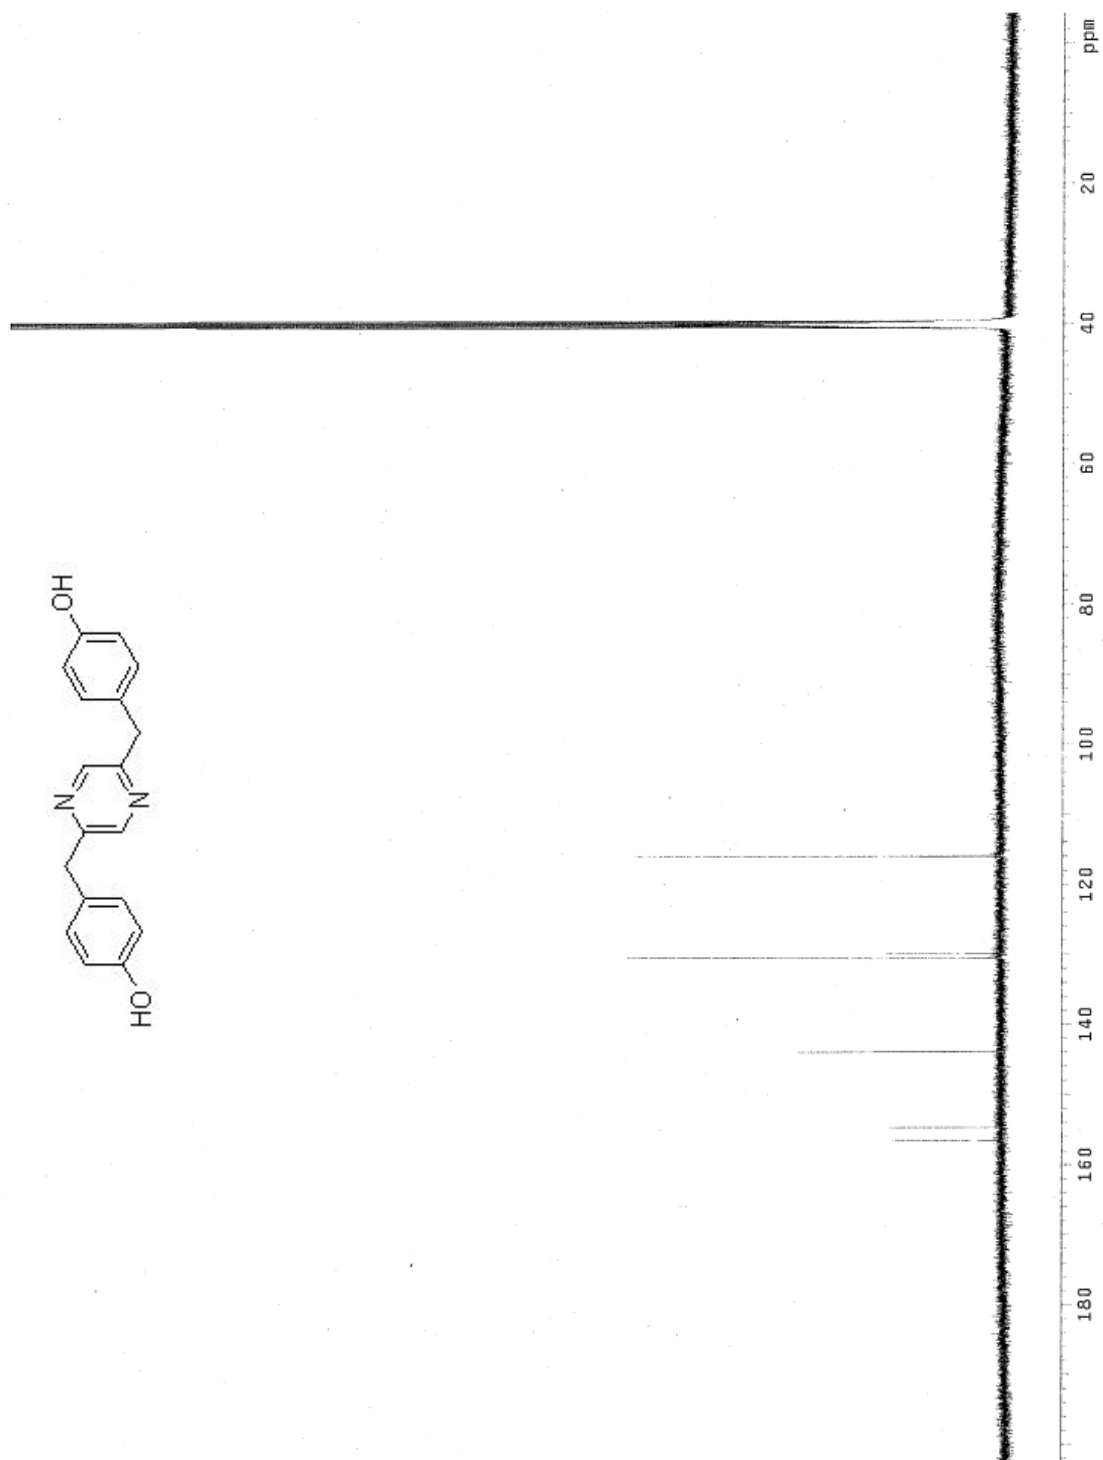

**Figure S7.**  $^{13}\text{C}$  NMR spectrum of **3**

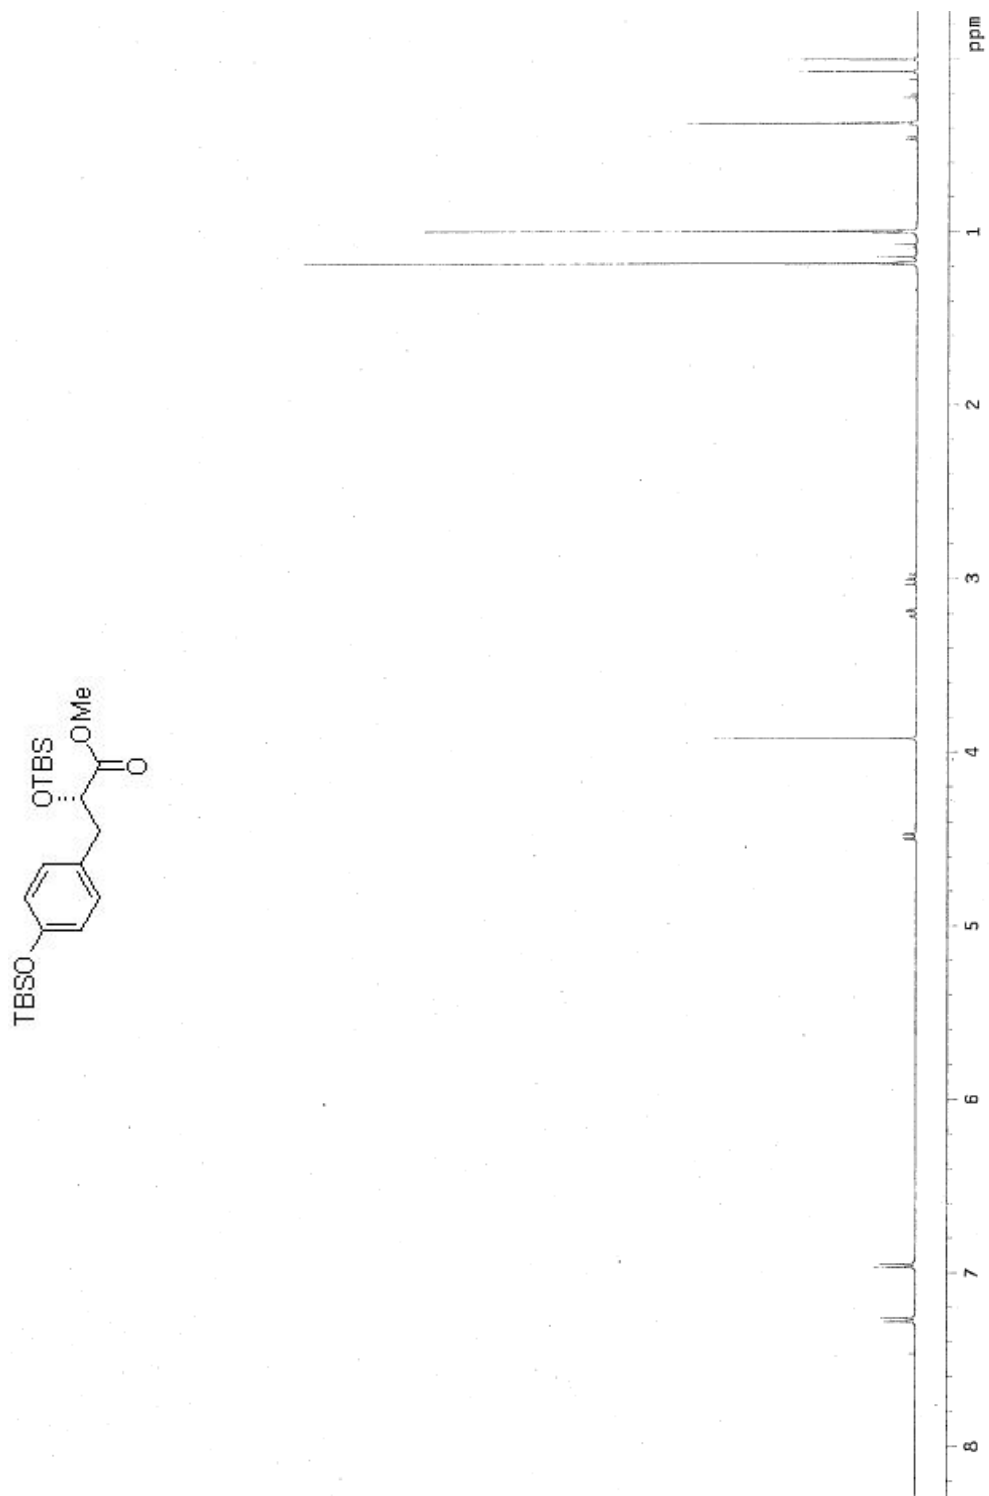

**Figure S8.** <sup>1</sup>H NMR spectrum of **6**

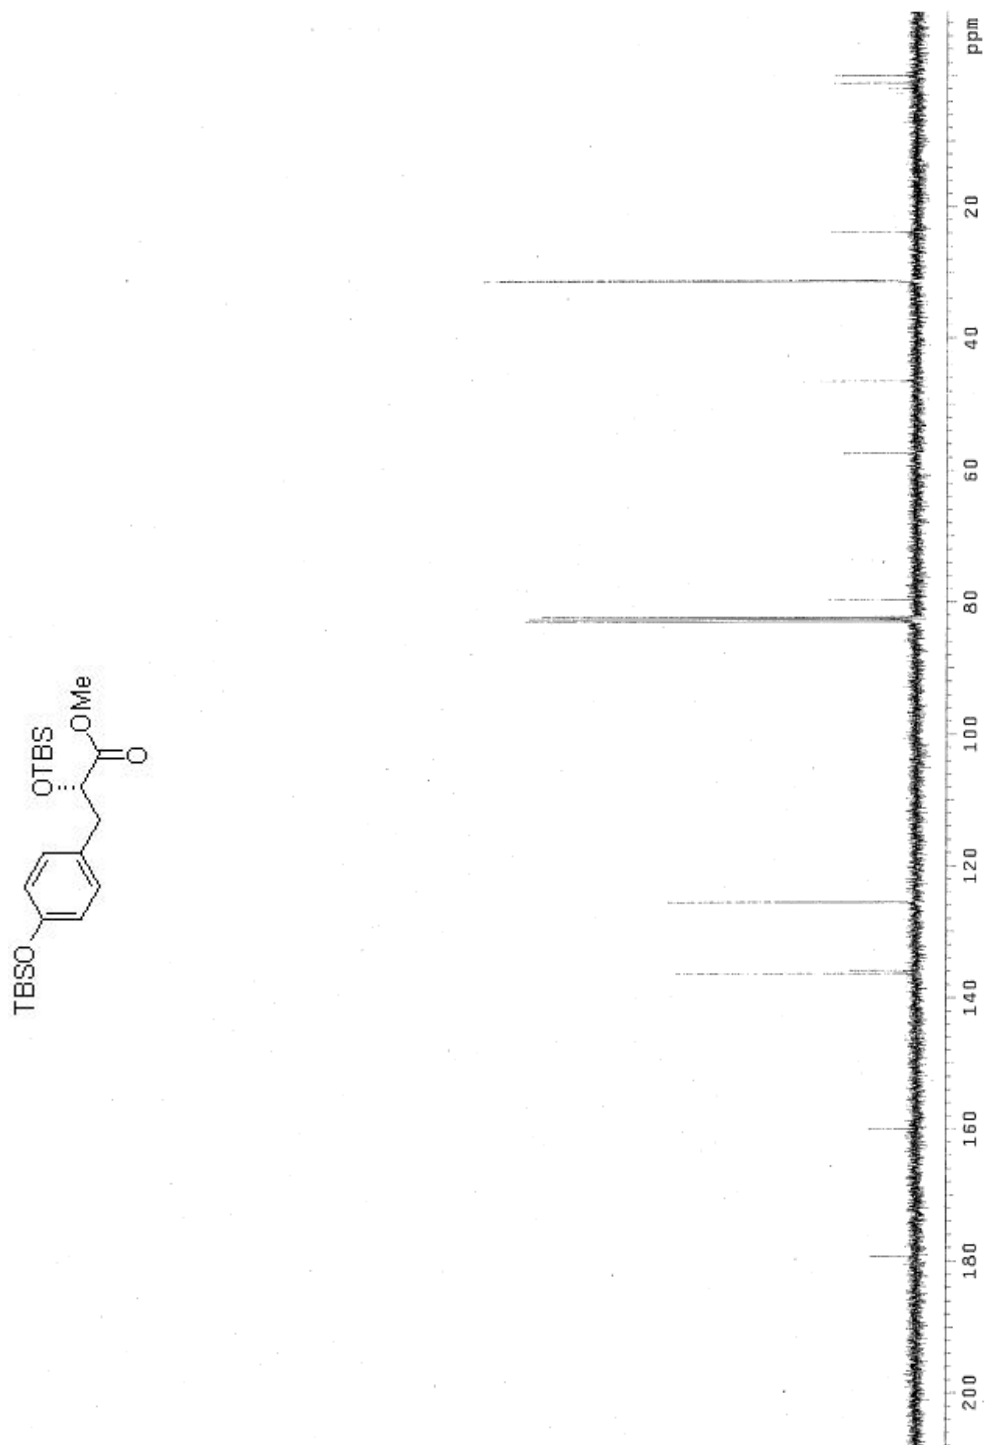

**Figure S9.**  $^{13}\text{C}$  NMR spectrum of 6

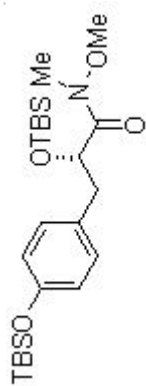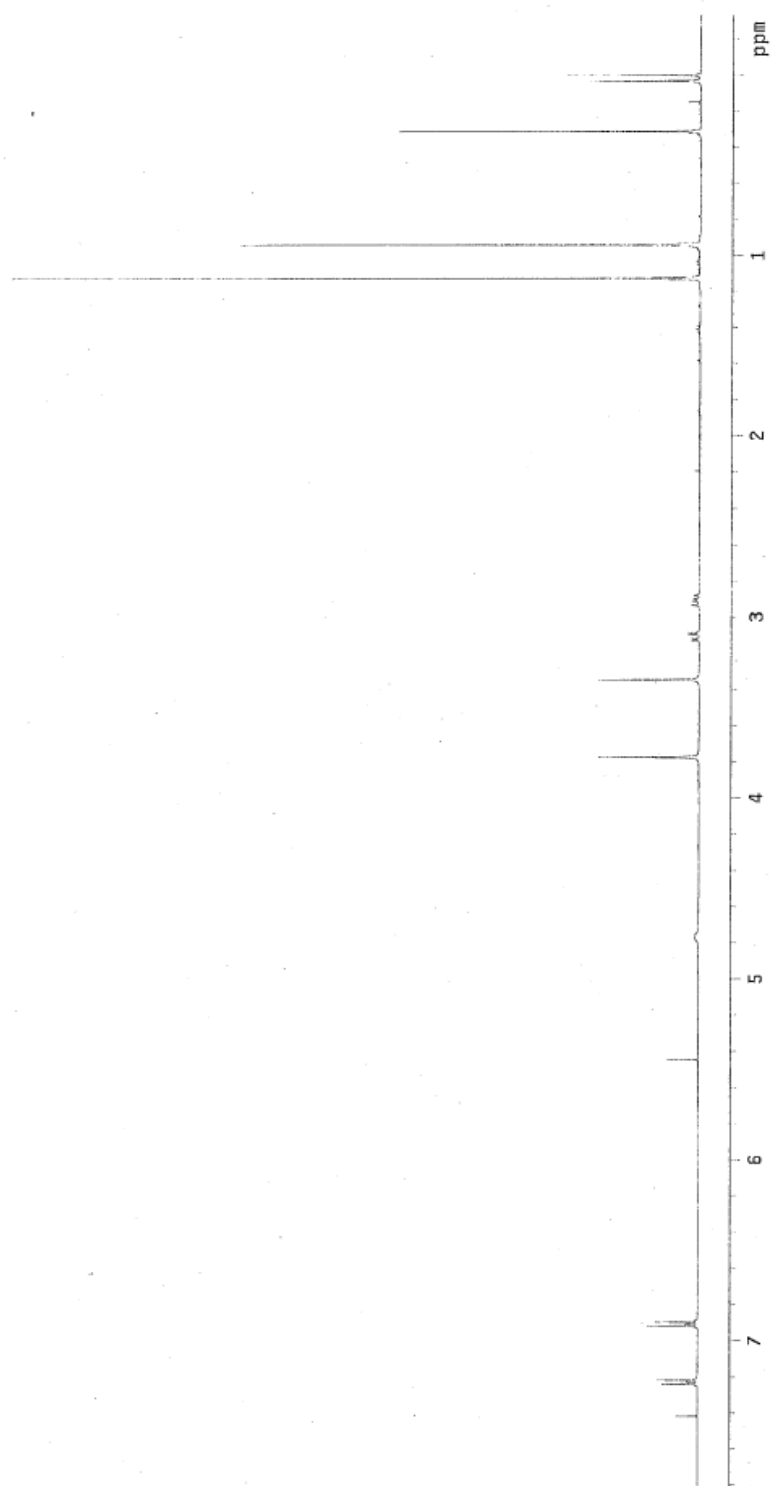

**Figure S10.**  $^1\text{H}$  NMR spectrum of 7

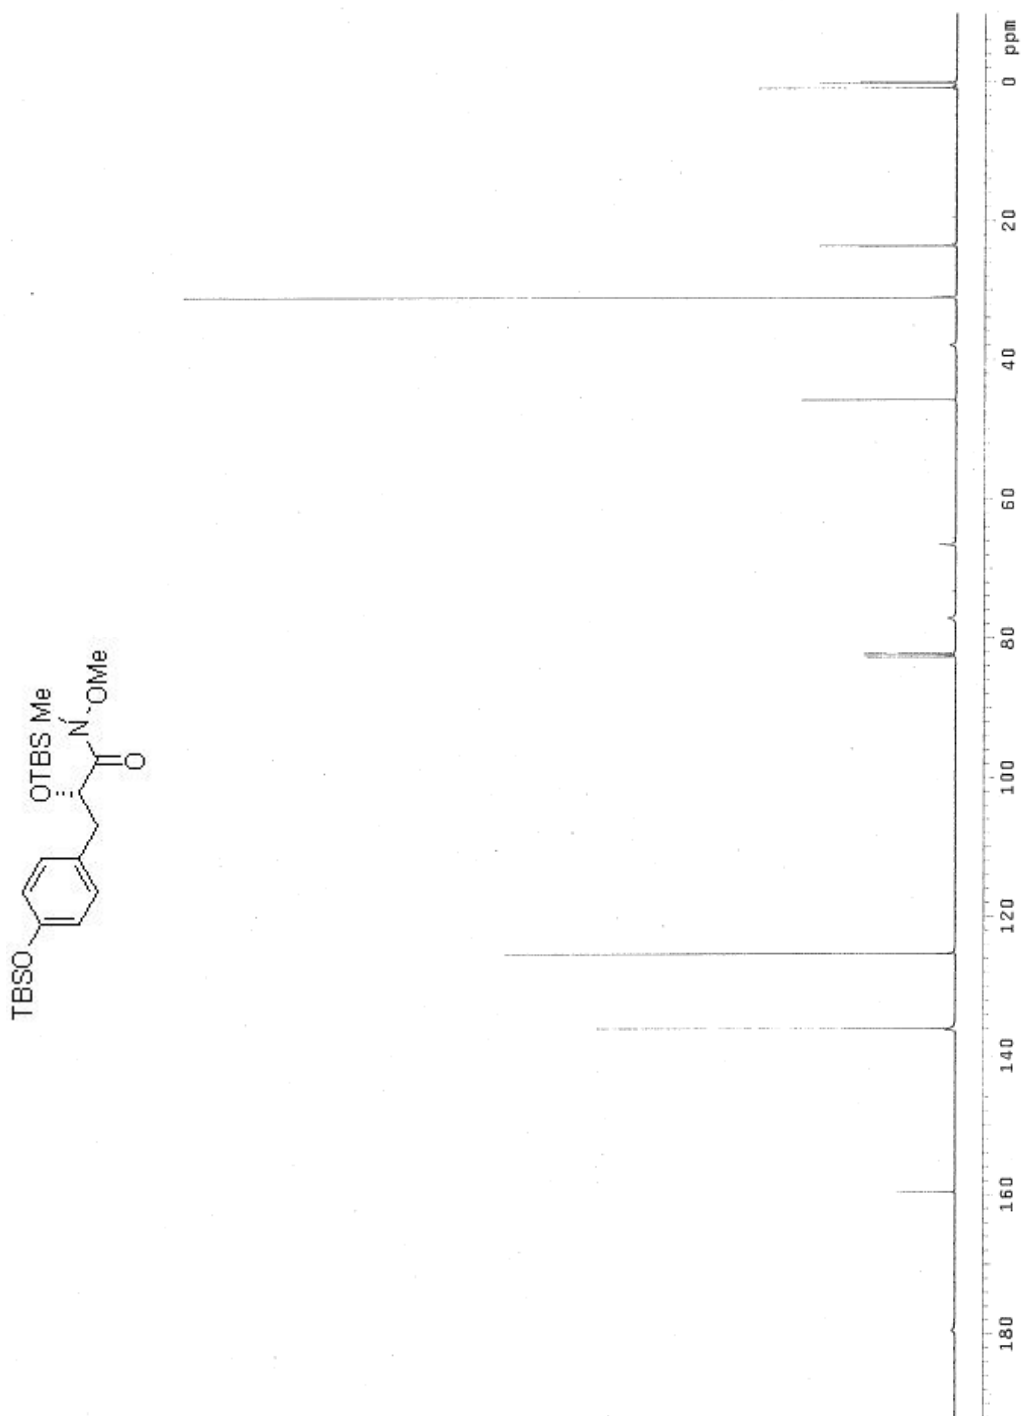

**Figure S11.**  $^{13}\text{C}$  NMR spectrum of **7**



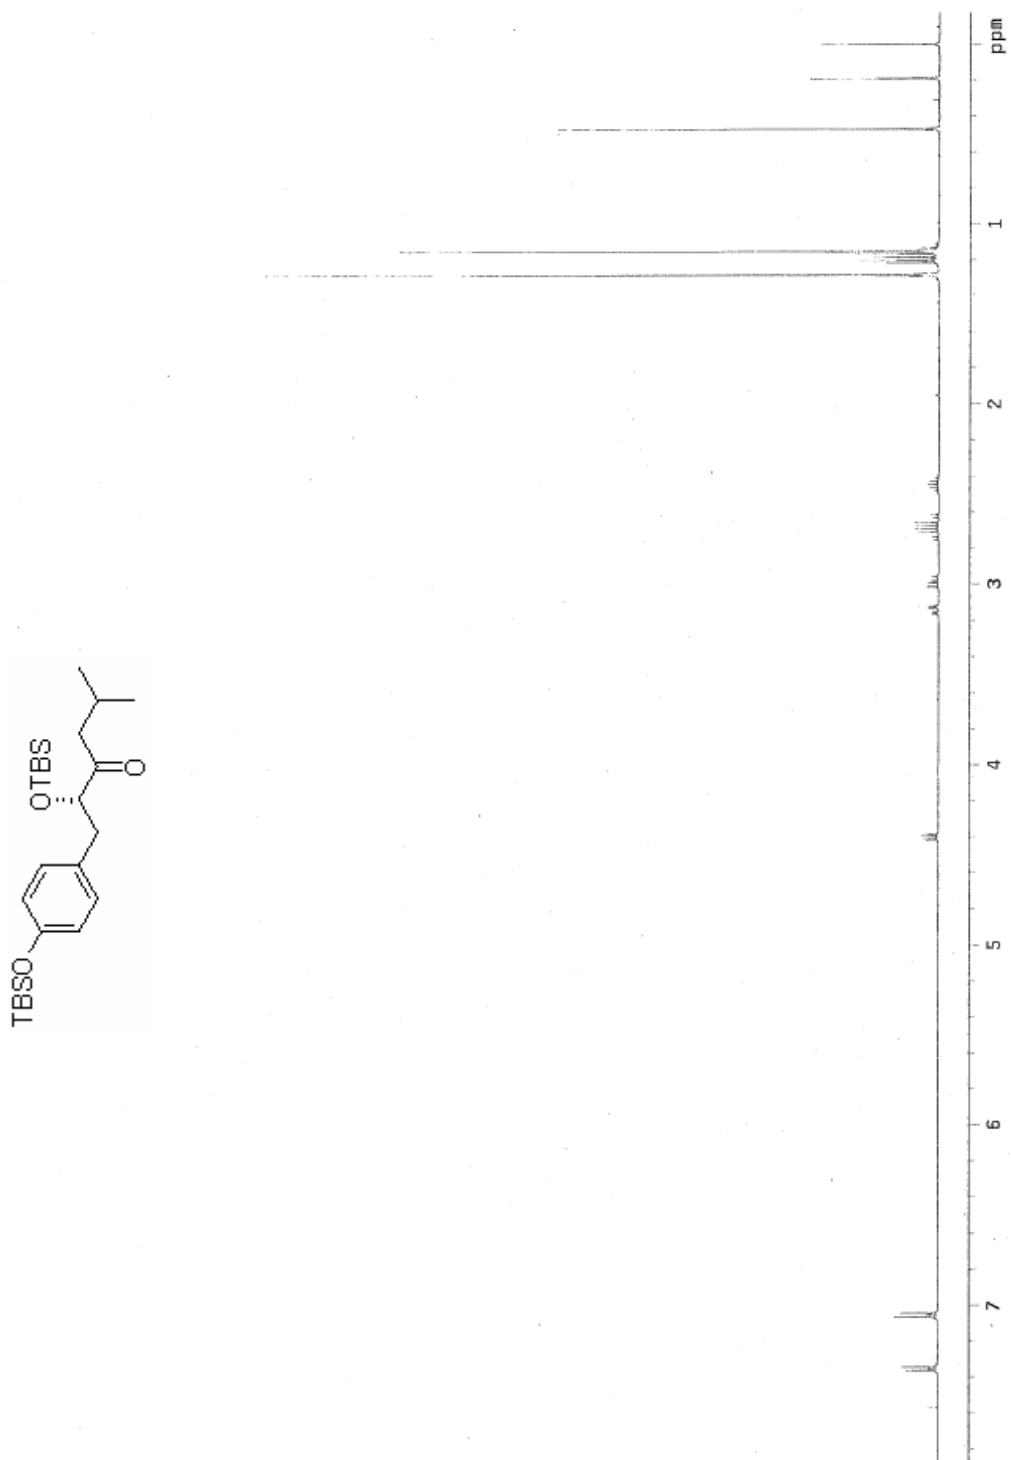

**Figure S12.** <sup>1</sup>H NMR spectrum of **8**

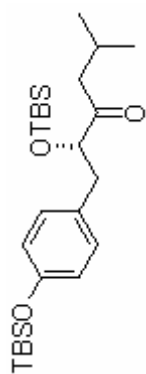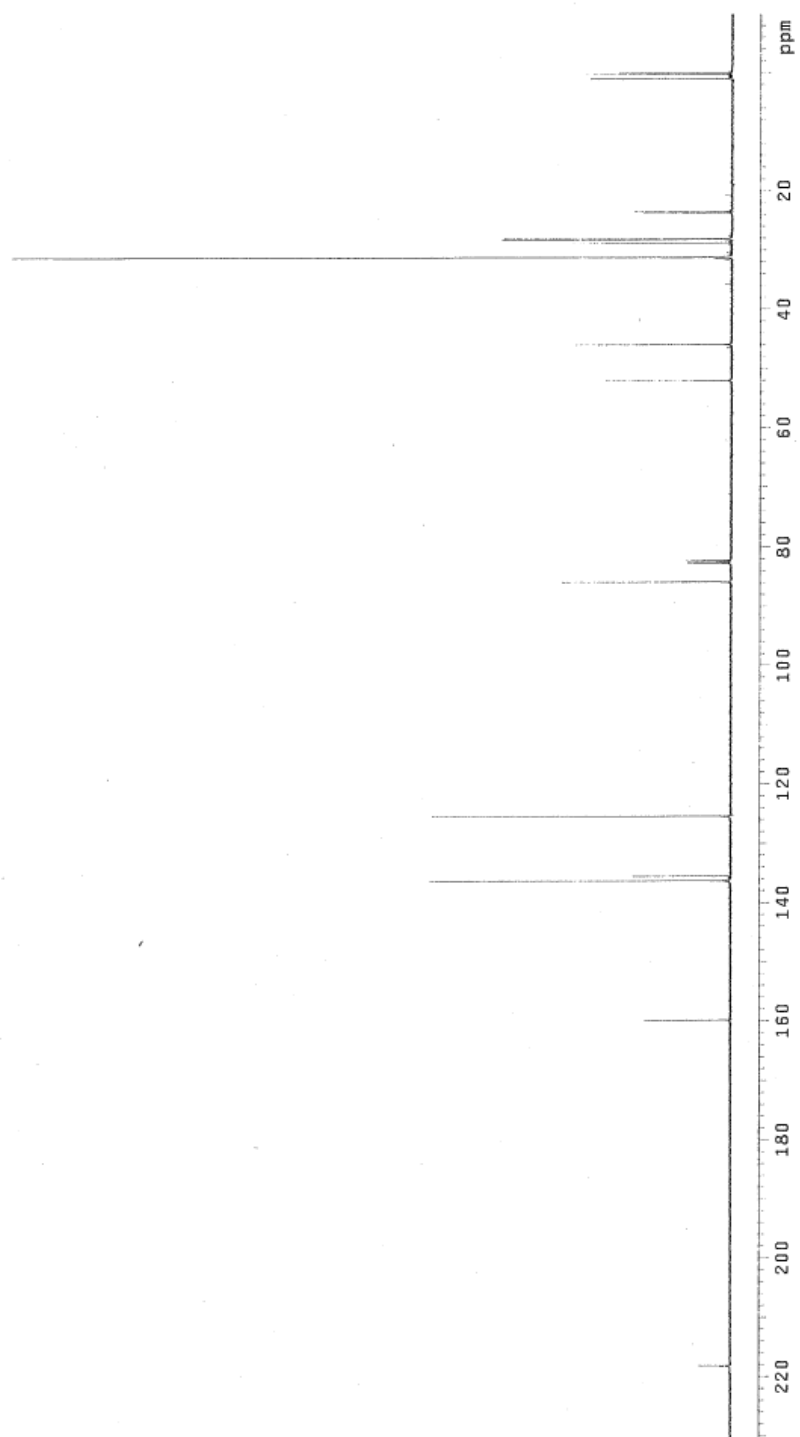

**Figure S13.**  $^{13}\text{C}$  NMR spectrum of **8**

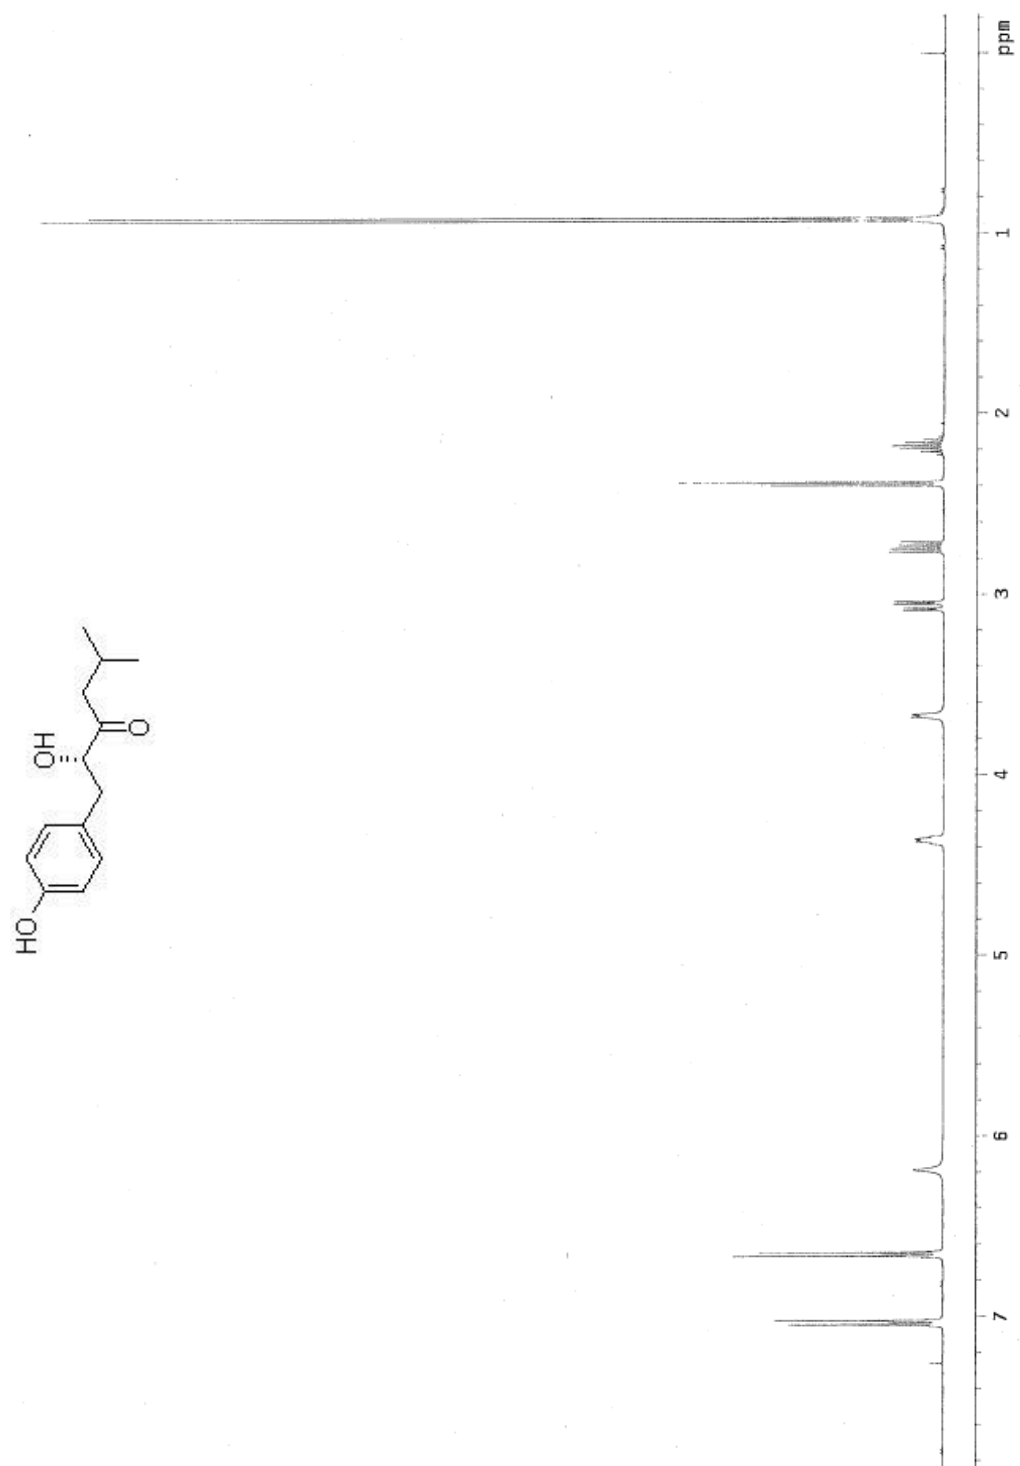

**Figure S14.** <sup>1</sup>H NMR spectrum of **9**

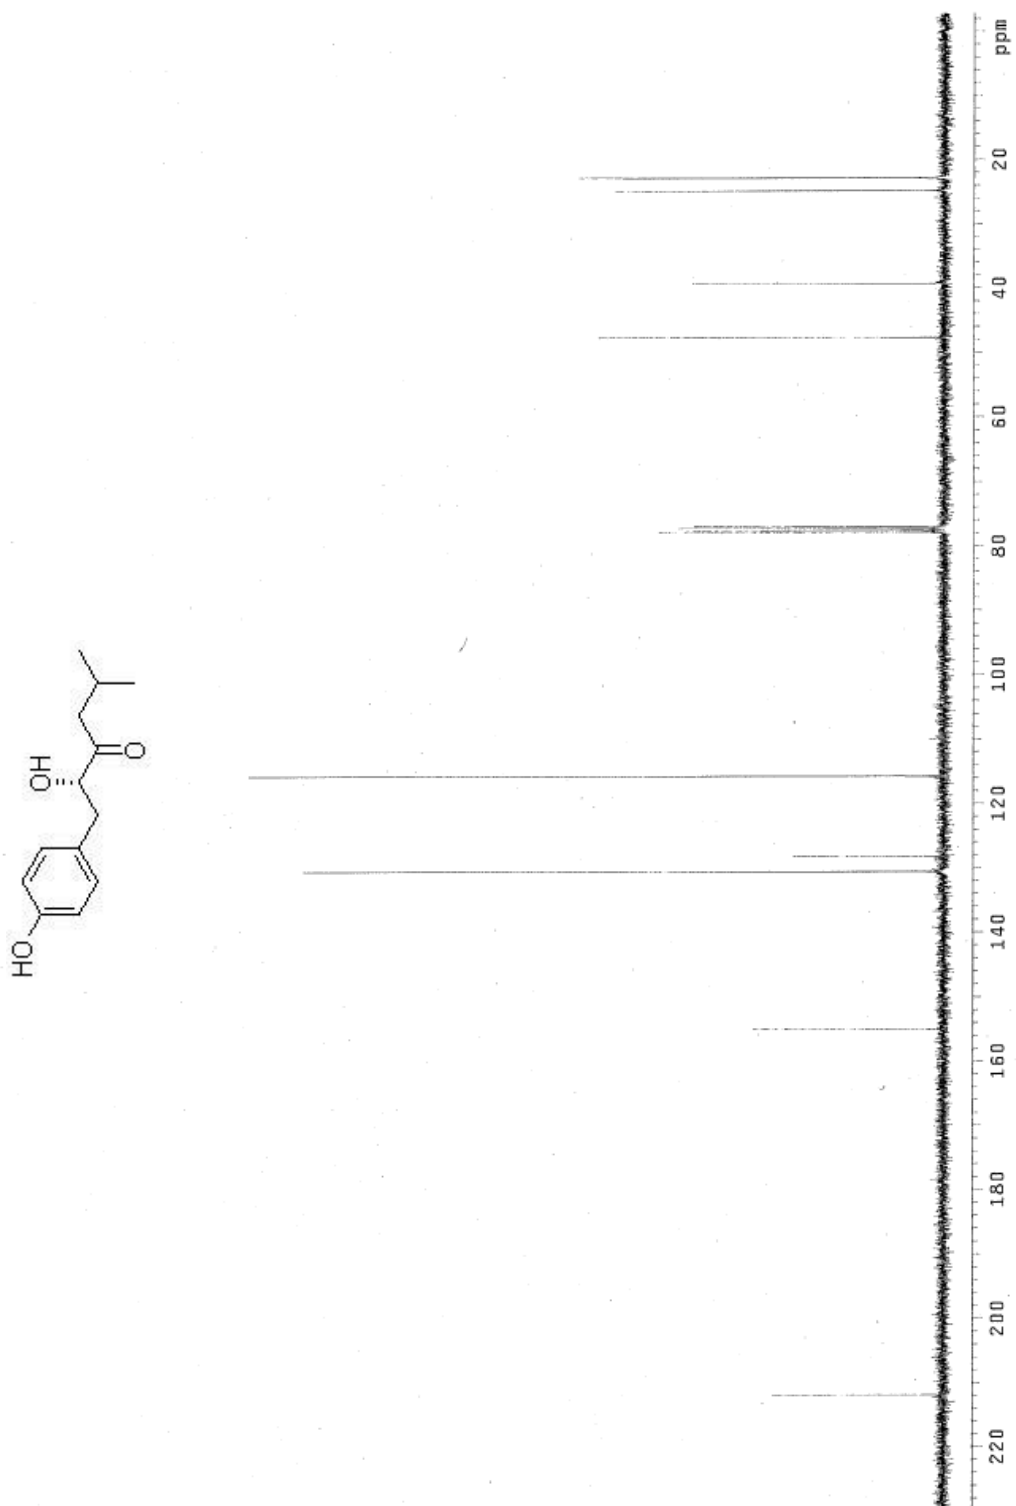

**Figure S15.**  $^{13}\text{C}$  NMR spectrum of **9**

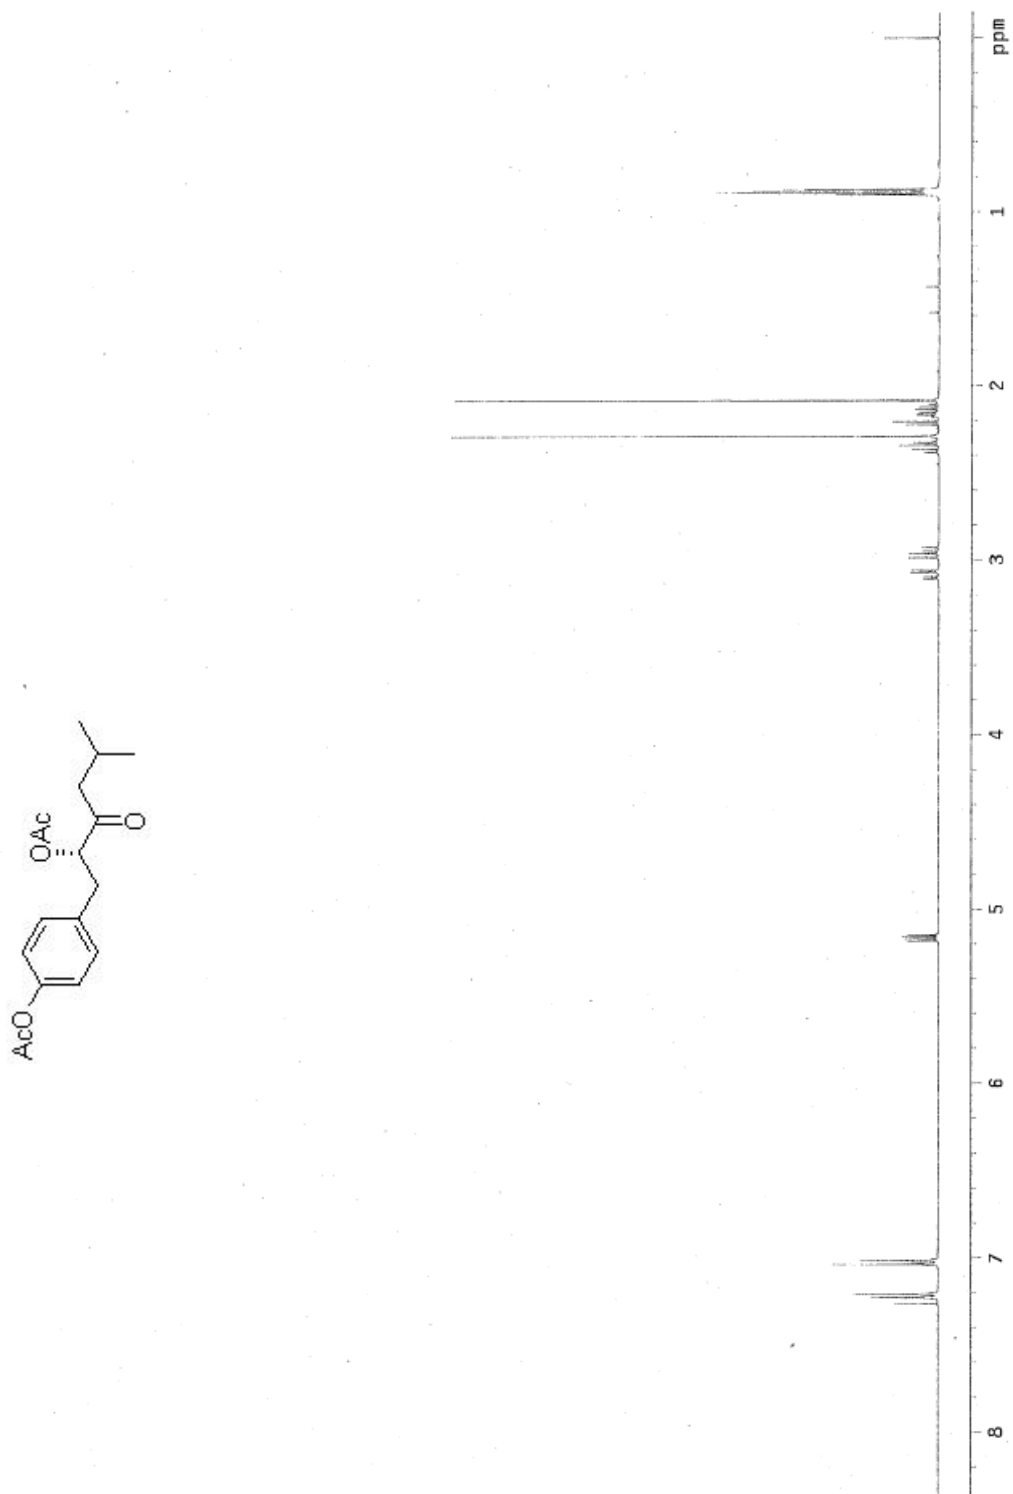

**Figure S16.** <sup>1</sup>H NMR spectrum of **10**

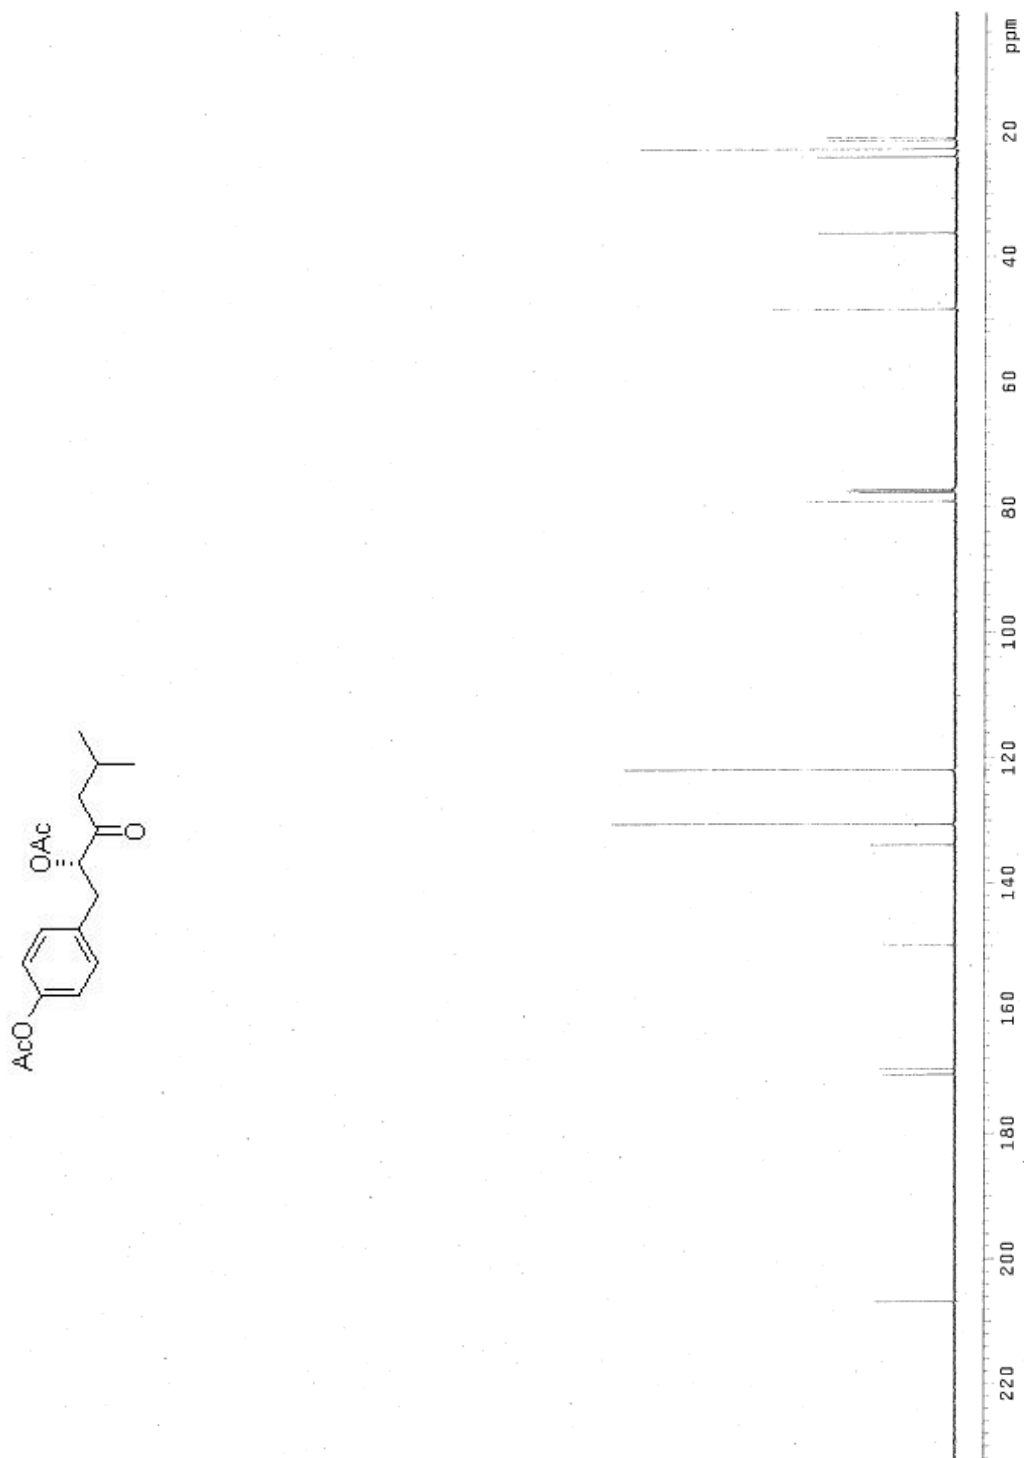

**Figure S17.**  $^{13}\text{C}$  NMR spectrum of **10**
